# Supplementary material for: The HSP90 Inhibitor Ganetespib Synergizes with the MET Kinase Inhibitor Crizotinib in both Crizotinib-Sensitive and -Resistant MET-Driven Tumor Models
Source: Oxford University Press journal article supplement (doi:10.1158/0008-5472.can-13-1156), 2013-10-12
Supplement: 00085472can131156-sup-tab1.pdf [file 00085472can131156-sup-tab1.pdf]

**Supplemental Table 1. Crizotinib and ganetespib synergistically inhibit colony growth of NIH3T3 cells expressing constitutively active, TKI-resistant MET (MET-Y1248H).** Combination index (CI) was calculated (as in Figure 3C). A CI value < 1 indicates synergy.

| Crizotinib<br>(nM) | Ganetespib<br>(nM) | Combination<br>Index (CI) |
|--------------------|--------------------|---------------------------|
| 150                | 10                 | 0.81                      |
| 200                | 10                 | 0.73                      |
